# Supplementary material
Source: MDPI journal article supplement (https://www.mdpi.com/2073-4395/13/5/1217)
Supplement: s1 [file s1]

**Supplementary Table S1** Origin, length of growing season, and flowering time of 18 genotypes of spring wheat used in field experiment. GAAS: Gansu Agricultural Academy Science; DIAAS: Dingxi Agricultural Academy Science; GAAU: Gansu Agricultural University; ICARDA: International Center for Agricultural Research in the Dry Areas. Anthesis was when anthers were visible in about 50% of spikelets in each PVC cylinder, and flowering time was defined as the duration from sowing to flowering.

| Genotype   | Genotypic type | Breeder/ Source | Year released or<br>introduced | Time from sowing<br>to flowering<br>(days) | Length of<br>growing<br>season (days) |
|------------|----------------|-----------------|--------------------------------|--------------------------------------------|---------------------------------------|
| Heshangtou | Landrace       | Landraces       | Before 1900                    | 82                                         | 115                                   |
| Jinbaoyin  | Landrace       | Landraces       | Before 1900                    | 90                                         | 124                                   |
| Dingxi24   | Cultivar       | DIAAS           | 1971                           | 90                                         | 122                                   |
| Lantian    | Cultivar       | GAAS            | 1993                           | 77                                         | 106                                   |
| Dingxi35   | Cultivar       | DIAAS           | 1996                           | 89                                         | 121                                   |

|            |          |        |              |    |     |
|------------|----------|--------|--------------|----|-----|
| Longchun23 | Cultivar | GAAS   | 2004         | 77 | 110 |
| Longchun30 | Cultivar | GAAS   | 2004         | 75 | 108 |
| Xihan2     | Cultivar | GAAU   | 2006         | 80 | 110 |
| Longchun26 | Cultivar | GAAS   | 2010         | 76 | 108 |
| Ganhan5    | Line     | GAAU   | Not released | 76 | 108 |
| Zhonghan4  | Line     | GAAS   | Not released | 76 | 110 |
| Ganhan3    | Line     | GAAU   | Not released | 79 | 112 |
| Zhonghan1  | Line     | GAAS   | Not released | 78 | 112 |
| Dingxi43-4 | Line     | DIAAS  | Not released | 78 | 110 |
| 021-128    | Line     | GAAS   | Not released | 77 | 111 |
| DAIRA-12   | Cultivar | ICARDA | 2012         | 82 | 109 |
| DURRA-5    | Cultivar | ICARDA | 2012         | 76 | 109 |
| NABUQ-6    | Unknown  | ICARDA | 2012         | 74 | 107 |

---

**Supplementary Table S2.** Yield components and time until flowering (days after sowing) of 18 genotypes of spring wheat grown in pots. Total biomass comprises roots, stem, leaves, and spikes; vegetative biomass comprises total biomass minus grain yield. Genotypes are listed in ascending order of grain yield.

| Genotypes ID | Genotypes  | Time from sowing to flowering (days) | Length of growing season (days) | Total biomass (g m <sup>-2</sup> ) | Vegetative biomass (g m <sup>-2</sup> ) | Grain yield (g m <sup>-2</sup> ) | Harvest index | Reproductive effort |
|--------------|------------|--------------------------------------|---------------------------------|------------------------------------|-----------------------------------------|----------------------------------|---------------|---------------------|
| 1            | Jinbaoyin  | 75±1                                 | 99±1                            | 1801                               | 1450                                    | 351                              | 0.22          | 0.19                |
| 2            | Dingxi24   | 72±1                                 | 98±1                            | 1887                               | 1463                                    | 425                              | 0.24          | 0.23                |
| 3            | Dingxi35   | 71±1                                 | 97±1                            | 2036                               | 1568                                    | 468                              | 0.25          | 0.23                |
| 4            | Heshangtou | 69±1                                 | 96±1                            | 1957                               | 1472                                    | 485                              | 0.27          | 0.25                |
| 5            | Longchun23 | 65±1                                 | 96±1                            | 1648                               | 1117                                    | 531                              | 0.34          | 0.32                |
| 6            | Xihan2     | 69±1                                 | 97±1                            | 1962                               | 1391                                    | 571                              | 0.31          | 0.29                |
| 7            | Zhonghan4  | 65±1                                 | 96±1                            | 1830                               | 1231                                    | 599                              | 0.35          | 0.33                |
| 8            | DAIRA-12   | 67±1                                 | 96±1                            | 1742                               | 1136                                    | 606                              | 0.37          | 0.35                |
| 9            | DURRA-5    | 68±1                                 | 97±1                            | 1756                               | 1143                                    | 612                              | 0.37          | 0.35                |
| 10           | Ganhan3    | 65±1                                 | 96±1                            | 1948                               | 1312                                    | 637                              | 0.35          | 0.33                |
| 11           | Zhonghan1  | 67±1                                 | 96±1                            | 1969                               | 1330                                    | 639                              | 0.35          | 0.32                |
| 12           | Dingxi43-4 | 69±1                                 | 97±1                            | 1782                               | 1139                                    | 642                              | 0.38          | 0.36                |
| 13           | 021-128    | 65±1                                 | 97±1                            | 1665                               | 1010                                    | 655                              | 0.41          | 0.39                |
| 14           | Ganhan5    | 63±1                                 | 96±1                            | 1685                               | 1030                                    | 655                              | 0.4           | 0.39                |
| 15           | Lantian    | 65±1                                 | 97±1                            | 1778                               | 1095                                    | 683                              | 0.4           | 0.38                |
| 16           | Longchun26 | 61±1                                 | 95±1                            | 1654                               | 955                                     | 699                              | 0.45          | 0.42                |
| 17           | Longchun30 | 64±1                                 | 96±1                            | 1760                               | 1023                                    | 737                              | 0.43          | 0.42                |
| 18           | NABUQ-6    | 61±1                                 | 96±1                            | 1766                               | 1017                                    | 750                              | 0.45          | 0.42                |
| <i>P</i>     |            | **                                   | **                              | *                                  | ***                                     | ***                              | ***           | ***                 |

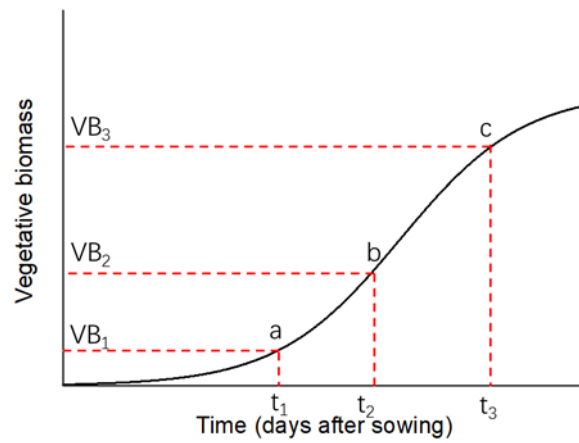

**Supplementary Figure. S1** Relationship between the time from sowing to flowering and final vegetative biomass at flowering for genotypes with different pre-flowering growth periods. If a plant flowers at  $t_1$ , its vegetative biomass is  $VB_1$ . The same applies to  $t_2$  and  $t_3$ .

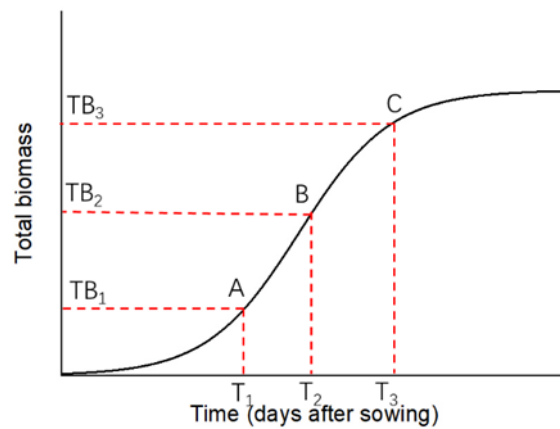

**Supplementary Figure. S2** Relationship between the time from sowing to maturity and final total biomass at the end of the growing season for genotypes with different growth periods. If a plant maturity at  $T_1$ , its total biomass is  $TB_1$ . The same applies to  $T_2$  and  $T_3$ .

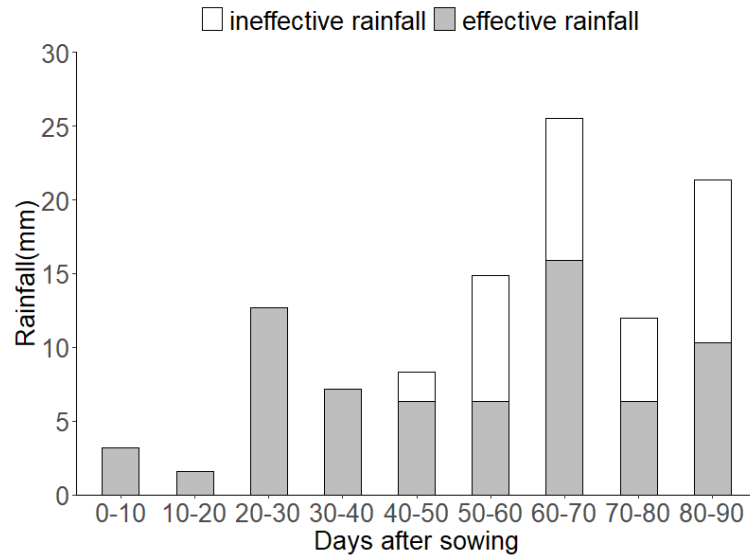

**Supplementary Figure. S3** Irrigation volume corresponding to average local rainfall during the same period from 2005 to 2014. Up to 45 days after sowing, rainfall less than 2 mm was not included, since it would have evaporated completely within a few of hours. The total volume of irrigation during the whole growing season was the same as that provided by 70 mm of rainfall.
